# Supplementary material for: Direct Chromatin PCR (DC-PCR): Hypotonic Conditions Allow Differentiation of Chromatin States during Thermal Cycling
Source: PubMed Central journal article supplement (PMC3440349; doi:10.1371/journal.pone.0044690), 2012-09-12
Supplement: pone.0044690.s001.pdf [file pone.0044690.s001.pdf]

c-Myc Primer Map

NM\_002467.4

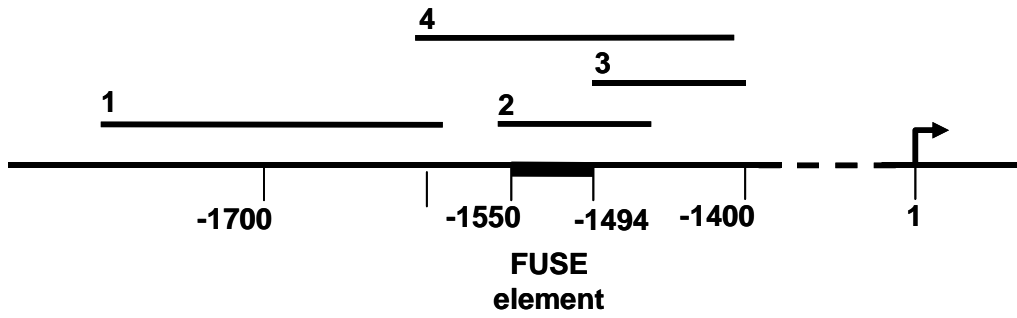

c-MYC Direct Chromatin-PCR

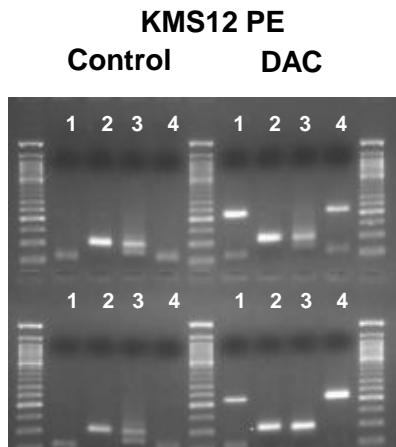

**Growing**   **Contact Inhibited**  
**(Confluent)**  
**Normal Human Fibroblasts**
