# Supplementary material for: Direct Chromatin PCR (DC-PCR): Hypotonic Conditions Allow Differentiation of Chromatin States during Thermal Cycling
Source: PubMed Central journal article supplement (PMC3440349; doi:10.1371/journal.pone.0044690), 2012-09-12
Supplement: pone.0044690.s002.pdf [file pone.0044690.s002.pdf]

Control  
DAC, 1  $\mu$ M  
DAC, 0.1  $\mu$ M

02-G-14

05-J-15

01-F-16

08-G-10

06-J-17

05-J-17

07-E-10

01-J-15

12-P-20

15-B-04

05-M-10

05-I-16

13-B-09

13-I-16

01-K-17

01-H-03

03-P-02

04-I-03

H<sub>2</sub>O, RT

H<sub>2</sub>O, RT

H<sub>2</sub>O, PCR

H<sub>2</sub>O, PCR

H<sub>2</sub>O, PCR

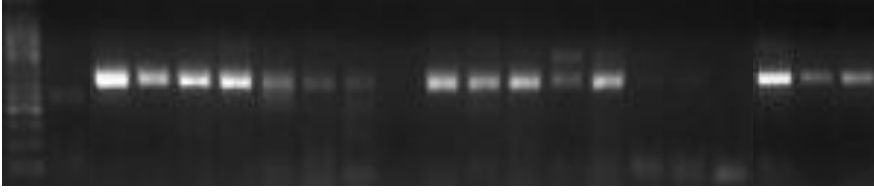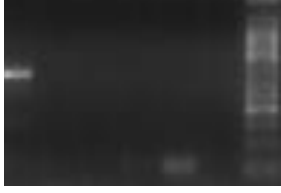

CDKN2A

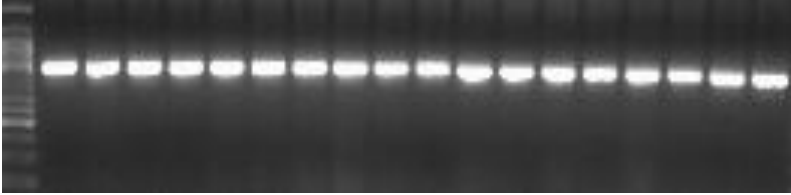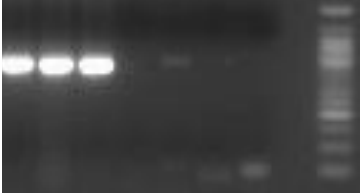

GAPDH
